# Supplementary material for: A comprehensive study of hygroscopic properties of calcium- and magnesium-containing salts: implication for hygroscopicity of mineral dust and sea salt aerosols
Source: Copernicus journal article supplement (doi:10.5194/acp-19-2115-2019), 2019-02-18
Supplement: Supplementary file 1 [file acp-19-2115-2019-supplement.pdf]

Supplement of Atmos. Chem. Phys., 19, 2115–2133, 2019  
<https://doi.org/10.5194/acp-19-2115-2019-supplement>  
© Author(s) 2019. This work is distributed under  
the Creative Commons Attribution 4.0 License.

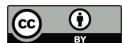

*Supplement of*

## **A comprehensive study of hygroscopic properties of calcium- and magnesium-containing salts: implication for hygroscopicity of mineral dust and sea salt aerosols**

**Liya Guo et al.**

*Correspondence to:* Mingjin Tang (mingjintang@gig.ac.cn)

The copyright of individual parts of the supplement might differ from the CC BY 4.0 License.

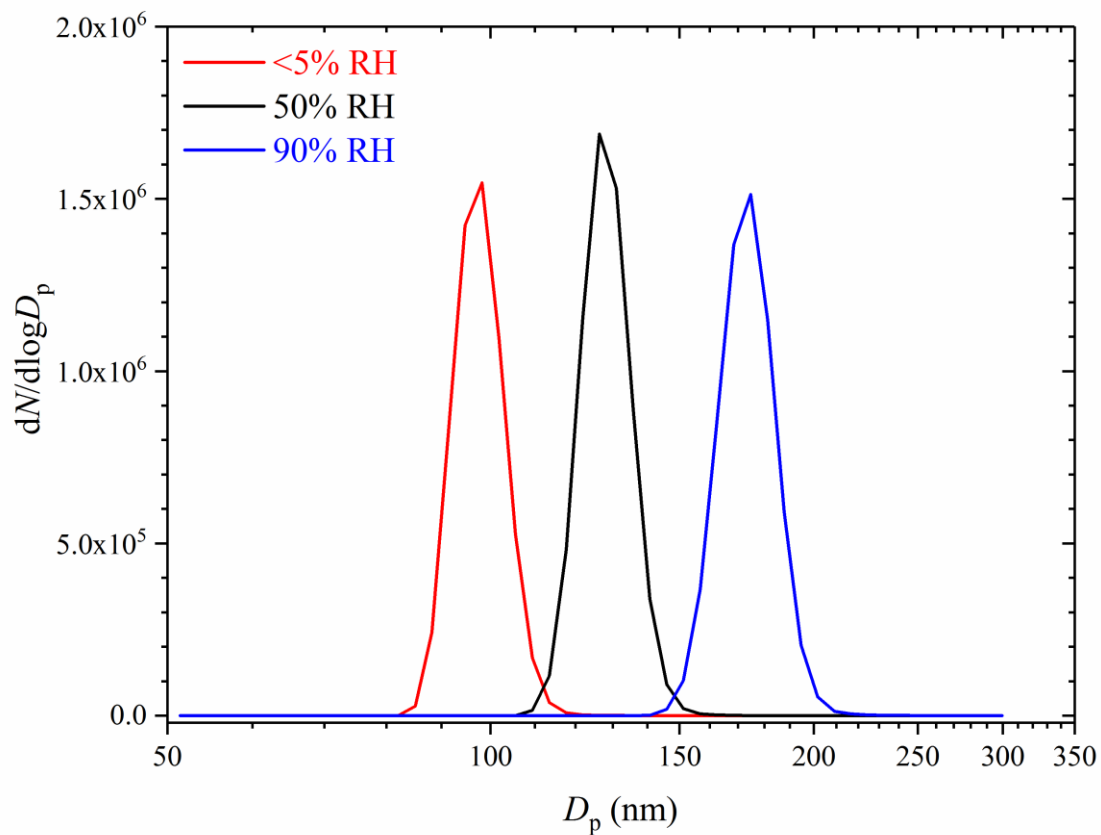

11  
 12 **Figure S1.** Number size distribution of Ca(NO<sub>3</sub>)<sub>2</sub> aerosol particles (with a dry mobility diameter  
 13 of 100 nm, as selected using a differential mobility analyzer) at <5, 50 and 90% RH.

14
